# Supplementary material for: Equity and justice in medical education: mapping a longitudinal curriculum across 4 years
Source: PubMed Central journal article supplement — BMC Med Educ. 2024 Oct 29;24:1229. doi: 10.1186/s12909-024-06235-y (PMC11520576; doi:10.1186/s12909-024-06235-y), 2024-10-29
Supplement: 12909_2024_6235_MOESM2_ESM.pdf [file 12909_2024_6235_MOESM2_ESM.pdf]

Supplemental Materials 2. Vagelos College of Physicians and Surgeons (VP&S) Four-Year Equity and Justice Curriculum Activities Mapped by Learning Objective

| Phase of Curriculum |                         | Anti-Racism Learning Objectives                                                                                                                                                                                                                                                    |                                                                                                                                        |                                                                                                                         |                                                                                                                                                                                                              |                                                                                                                                            |                                                                                                                                                                                                                    |                                                                                                              |                                                                                                          |                                                                                                                                                                                                                                          |                                                                                                                                   |
|---------------------|-------------------------|------------------------------------------------------------------------------------------------------------------------------------------------------------------------------------------------------------------------------------------------------------------------------------|----------------------------------------------------------------------------------------------------------------------------------------|-------------------------------------------------------------------------------------------------------------------------|--------------------------------------------------------------------------------------------------------------------------------------------------------------------------------------------------------------|--------------------------------------------------------------------------------------------------------------------------------------------|--------------------------------------------------------------------------------------------------------------------------------------------------------------------------------------------------------------------|--------------------------------------------------------------------------------------------------------------|----------------------------------------------------------------------------------------------------------|------------------------------------------------------------------------------------------------------------------------------------------------------------------------------------------------------------------------------------------|-----------------------------------------------------------------------------------------------------------------------------------|
|                     |                         | 1. Demonstrate evidence of self-reflection and how one's personal identities, biases, and lived experiences may influence one's perspectives, clinical decision-making, and practice in interactions with patients, families, communities, and all members of the health care team | 2. Recognize historical and present systemic biases that can impact care of diverse patients and identify strategies to mitigate them. | 3. Identify value of diversity in patient care, healthcare systems and scientific research and practice (IPE, teamwork) | 4. Interpret historical and present impacts of systemic racism, colonization, white supremacy, acculturation, assimilation, and immigration on clinical care, population health and health care organization | 5. Analyze the intersection of race, class, socioeconomic status, and other social determinants of health on patient and population health | 6. Articulate the distinction between race as a social construct (as opposed to a risk factor for disease), and racism as a cause of health care inequities; and the difference between race and genetic ancestry. | 7. Appraise the role of health system policies, procedures, and practices in promoting or suppressing equity | 8. Critique public policy approaches to promote social justice and address social determinants of health | 9. Employs strategies to advocate for oneself and serve as an ally to others when there is injustice (e.g., microaggression, discrimination, racism) and increase belongingness within diverse healthcare teams and patient populations. | 10. Recognize the importance of fostering partnerships with communities to engender solutions that are both effective and trusted |
| Ready for VP&S      |                         |                                                                                                                                                                                                                                                                                    |                                                                                                                                        |                                                                                                                         |                                                                                                                                                                                                              |                                                                                                                                            |                                                                                                                                                                                                                    |                                                                                                              |                                                                                                          |                                                                                                                                                                                                                                          |                                                                                                                                   |
|                     | Orientation             | X                                                                                                                                                                                                                                                                                  |                                                                                                                                        | X                                                                                                                       | X                                                                                                                                                                                                            | X                                                                                                                                          | X                                                                                                                                                                                                                  | X                                                                                                            |                                                                                                          |                                                                                                                                                                                                                                          | X                                                                                                                                 |
| Fundamentals        |                         |                                                                                                                                                                                                                                                                                    |                                                                                                                                        |                                                                                                                         |                                                                                                                                                                                                              |                                                                                                                                            |                                                                                                                                                                                                                    |                                                                                                              |                                                                                                          |                                                                                                                                                                                                                                          |                                                                                                                                   |
|                     | Molecular Mechanisms    |                                                                                                                                                                                                                                                                                    | X                                                                                                                                      |                                                                                                                         |                                                                                                                                                                                                              | X                                                                                                                                          |                                                                                                                                                                                                                    |                                                                                                              | X                                                                                                        |                                                                                                                                                                                                                                          |                                                                                                                                   |
|                     | Pharmacology            |                                                                                                                                                                                                                                                                                    |                                                                                                                                        | X                                                                                                                       |                                                                                                                                                                                                              |                                                                                                                                            | X                                                                                                                                                                                                                  |                                                                                                              |                                                                                                          | X                                                                                                                                                                                                                                        |                                                                                                                                   |
|                     | Genetics                |                                                                                                                                                                                                                                                                                    | X                                                                                                                                      |                                                                                                                         |                                                                                                                                                                                                              | X                                                                                                                                          |                                                                                                                                                                                                                    | X                                                                                                            |                                                                                                          |                                                                                                                                                                                                                                          |                                                                                                                                   |
|                     | Anatomy                 |                                                                                                                                                                                                                                                                                    |                                                                                                                                        | X                                                                                                                       | X                                                                                                                                                                                                            |                                                                                                                                            |                                                                                                                                                                                                                    |                                                                                                              |                                                                                                          |                                                                                                                                                                                                                                          |                                                                                                                                   |
|                     | Histology and Pathology |                                                                                                                                                                                                                                                                                    |                                                                                                                                        |                                                                                                                         |                                                                                                                                                                                                              |                                                                                                                                            |                                                                                                                                                                                                                    |                                                                                                              |                                                                                                          |                                                                                                                                                                                                                                          |                                                                                                                                   |
|                     | FCM I                   | X                                                                                                                                                                                                                                                                                  | X                                                                                                                                      | X                                                                                                                       | X                                                                                                                                                                                                            | X                                                                                                                                          | X                                                                                                                                                                                                                  | X                                                                                                            |                                                                                                          | X                                                                                                                                                                                                                                        |                                                                                                                                   |
|                     | Data Science            |                                                                                                                                                                                                                                                                                    | X                                                                                                                                      | X                                                                                                                       | X                                                                                                                                                                                                            | X                                                                                                                                          |                                                                                                                                                                                                                    | X                                                                                                            | X                                                                                                        |                                                                                                                                                                                                                                          |                                                                                                                                   |
|                     | Evidence-Based Medicine |                                                                                                                                                                                                                                                                                    | X                                                                                                                                      | X                                                                                                                       | X                                                                                                                                                                                                            |                                                                                                                                            |                                                                                                                                                                                                                    |                                                                                                              |                                                                                                          |                                                                                                                                                                                                                                          |                                                                                                                                   |

| Phase of Curriculum       |                    | Anti-Racism Learning Objectives                                                                                                                                                                                                                                                    |                                                                                                                                        |                                                                                                                         |                                                                                                                                                                                                              |                                                                                                                                            |                                                                                                                                                                                                                    |                                                                                                              |                                                                                                          |                                                                                                                                                                                                                                          |                                                                                                                                   |
|---------------------------|--------------------|------------------------------------------------------------------------------------------------------------------------------------------------------------------------------------------------------------------------------------------------------------------------------------|----------------------------------------------------------------------------------------------------------------------------------------|-------------------------------------------------------------------------------------------------------------------------|--------------------------------------------------------------------------------------------------------------------------------------------------------------------------------------------------------------|--------------------------------------------------------------------------------------------------------------------------------------------|--------------------------------------------------------------------------------------------------------------------------------------------------------------------------------------------------------------------|--------------------------------------------------------------------------------------------------------------|----------------------------------------------------------------------------------------------------------|------------------------------------------------------------------------------------------------------------------------------------------------------------------------------------------------------------------------------------------|-----------------------------------------------------------------------------------------------------------------------------------|
|                           |                    | 1. Demonstrate evidence of self-reflection and how one's personal identities, biases, and lived experiences may influence one's perspectives, clinical decision-making, and practice in interactions with patients, families, communities, and all members of the health care team | 2. Recognize historical and present systemic biases that can impact care of diverse patients and identify strategies to mitigate them. | 3. Identify value of diversity in patient care, healthcare systems and scientific research and practice (IPE, teamwork) | 4. Interpret historical and present impacts of systemic racism, colonization, white supremacy, acculturation, assimilation, and immigration on clinical care, population health and health care organization | 5. Analyze the intersection of race, class, socioeconomic status, and other social determinants of health on patient and population health | 6. Articulate the distinction between race as a social construct (as opposed to a risk factor for disease), and racism as a cause of health care inequities; and the difference between race and genetic ancestry. | 7. Appraise the role of health system policies, procedures, and practices in promoting or suppressing equity | 8. Critique public policy approaches to promote social justice and address social determinants of health | 9. Employs strategies to advocate for oneself and serve as an ally to others when there is injustice (e.g., microaggression, discrimination, racism) and increase belongingness within diverse healthcare teams and patient populations. | 10. Recognize the importance of fostering partnerships with communities to engender solutions that are both effective and trusted |
|                           | BHD                | X                                                                                                                                                                                                                                                                                  | X                                                                                                                                      | X                                                                                                                       | X                                                                                                                                                                                                            | X                                                                                                                                          | X                                                                                                                                                                                                                  | X                                                                                                            | X                                                                                                        | X                                                                                                                                                                                                                                        | X                                                                                                                                 |
|                           | Psychiatry         | X                                                                                                                                                                                                                                                                                  | X                                                                                                                                      |                                                                                                                         |                                                                                                                                                                                                              | X                                                                                                                                          | X                                                                                                                                                                                                                  | X                                                                                                            |                                                                                                          |                                                                                                                                                                                                                                          |                                                                                                                                   |
|                           | Narrative Medicine | X                                                                                                                                                                                                                                                                                  |                                                                                                                                        |                                                                                                                         |                                                                                                                                                                                                              |                                                                                                                                            |                                                                                                                                                                                                                    |                                                                                                              |                                                                                                          |                                                                                                                                                                                                                                          |                                                                                                                                   |
|                           | FCM II             | X                                                                                                                                                                                                                                                                                  |                                                                                                                                        | X                                                                                                                       | X                                                                                                                                                                                                            |                                                                                                                                            |                                                                                                                                                                                                                    | X                                                                                                            |                                                                                                          |                                                                                                                                                                                                                                          |                                                                                                                                   |
|                           | FCM III            |                                                                                                                                                                                                                                                                                    |                                                                                                                                        |                                                                                                                         | X                                                                                                                                                                                                            |                                                                                                                                            | X                                                                                                                                                                                                                  | X                                                                                                            |                                                                                                          |                                                                                                                                                                                                                                          | X                                                                                                                                 |
| Major Clinical Year (MCY) |                    |                                                                                                                                                                                                                                                                                    |                                                                                                                                        |                                                                                                                         |                                                                                                                                                                                                              |                                                                                                                                            |                                                                                                                                                                                                                    |                                                                                                              |                                                                                                          |                                                                                                                                                                                                                                          |                                                                                                                                   |
| Core Rotations            | OB/GYN             |                                                                                                                                                                                                                                                                                    | X                                                                                                                                      | X                                                                                                                       | X                                                                                                                                                                                                            |                                                                                                                                            | X                                                                                                                                                                                                                  |                                                                                                              |                                                                                                          |                                                                                                                                                                                                                                          |                                                                                                                                   |
|                           | Surgery            |                                                                                                                                                                                                                                                                                    |                                                                                                                                        |                                                                                                                         |                                                                                                                                                                                                              |                                                                                                                                            |                                                                                                                                                                                                                    |                                                                                                              |                                                                                                          | X                                                                                                                                                                                                                                        |                                                                                                                                   |
|                           | Neurology          |                                                                                                                                                                                                                                                                                    |                                                                                                                                        |                                                                                                                         |                                                                                                                                                                                                              |                                                                                                                                            |                                                                                                                                                                                                                    |                                                                                                              |                                                                                                          |                                                                                                                                                                                                                                          |                                                                                                                                   |
|                           | Psychiatry         |                                                                                                                                                                                                                                                                                    |                                                                                                                                        |                                                                                                                         | X                                                                                                                                                                                                            | X                                                                                                                                          |                                                                                                                                                                                                                    | X                                                                                                            |                                                                                                          |                                                                                                                                                                                                                                          |                                                                                                                                   |
|                           | Pediatrics         |                                                                                                                                                                                                                                                                                    | X                                                                                                                                      |                                                                                                                         |                                                                                                                                                                                                              | X                                                                                                                                          |                                                                                                                                                                                                                    | X                                                                                                            |                                                                                                          |                                                                                                                                                                                                                                          |                                                                                                                                   |



| Phase of Curriculum                   |                                                                                       | Anti-Racism Learning Objectives                                                                                                                                                                                                                                                    |                                                                                                                                        |                                                                                                                         |                                                                                                                                                                                                              |                                                                                                                                            |                                                                                                                                                                                                                    |                                                                                                              |                                                                                                          |                                                                                                                                                                                                                                          |                                                                                                                                   |
|---------------------------------------|---------------------------------------------------------------------------------------|------------------------------------------------------------------------------------------------------------------------------------------------------------------------------------------------------------------------------------------------------------------------------------|----------------------------------------------------------------------------------------------------------------------------------------|-------------------------------------------------------------------------------------------------------------------------|--------------------------------------------------------------------------------------------------------------------------------------------------------------------------------------------------------------|--------------------------------------------------------------------------------------------------------------------------------------------|--------------------------------------------------------------------------------------------------------------------------------------------------------------------------------------------------------------------|--------------------------------------------------------------------------------------------------------------|----------------------------------------------------------------------------------------------------------|------------------------------------------------------------------------------------------------------------------------------------------------------------------------------------------------------------------------------------------|-----------------------------------------------------------------------------------------------------------------------------------|
|                                       |                                                                                       | 1. Demonstrate evidence of self-reflection and how one's personal identities, biases, and lived experiences may influence one's perspectives, clinical decision-making, and practice in interactions with patients, families, communities, and all members of the health care team | 2. Recognize historical and present systemic biases that can impact care of diverse patients and identify strategies to mitigate them. | 3. Identify value of diversity in patient care, healthcare systems and scientific research and practice (IPE, teamwork) | 4. Interpret historical and present impacts of systemic racism, colonization, white supremacy, acculturation, assimilation, and immigration on clinical care, population health and health care organization | 5. Analyze the intersection of race, class, socioeconomic status, and other social determinants of health on patient and population health | 6. Articulate the distinction between race as a social construct (as opposed to a risk factor for disease), and racism as a cause of health care inequities; and the difference between race and genetic ancestry. | 7. Appraise the role of health system policies, procedures, and practices in promoting or suppressing equity | 8. Critique public policy approaches to promote social justice and address social determinants of health | 9. Employs strategies to advocate for oneself and serve as an ally to others when there is injustice (e.g., microaggression, discrimination, racism) and increase belongingness within diverse healthcare teams and patient populations. | 10. Recognize the importance of fostering partnerships with communities to engender solutions that are both effective and trusted |
| Differentiation and Integration (D&I) |                                                                                       |                                                                                                                                                                                                                                                                                    |                                                                                                                                        |                                                                                                                         |                                                                                                                                                                                                              |                                                                                                                                            |                                                                                                                                                                                                                    |                                                                                                              |                                                                                                          |                                                                                                                                                                                                                                          |                                                                                                                                   |
|                                       | R4R                                                                                   |                                                                                                                                                                                                                                                                                    |                                                                                                                                        |                                                                                                                         |                                                                                                                                                                                                              |                                                                                                                                            |                                                                                                                                                                                                                    |                                                                                                              |                                                                                                          | X                                                                                                                                                                                                                                        |                                                                                                                                   |
| Electives                             | Advanced Topics in Global Health*                                                     |                                                                                                                                                                                                                                                                                    | X                                                                                                                                      |                                                                                                                         | X                                                                                                                                                                                                            |                                                                                                                                            | X                                                                                                                                                                                                                  | X                                                                                                            | X                                                                                                        |                                                                                                                                                                                                                                          |                                                                                                                                   |
|                                       | Human Nature: DNA, Race, and Identity*                                                |                                                                                                                                                                                                                                                                                    | X                                                                                                                                      |                                                                                                                         | X                                                                                                                                                                                                            |                                                                                                                                            | X                                                                                                                                                                                                                  | X                                                                                                            | X                                                                                                        |                                                                                                                                                                                                                                          |                                                                                                                                   |
|                                       | Interdisciplinary Correlation: Using the Humanities to Explore Healthcare Inequities* |                                                                                                                                                                                                                                                                                    | X                                                                                                                                      |                                                                                                                         | X                                                                                                                                                                                                            |                                                                                                                                            | X                                                                                                                                                                                                                  | X                                                                                                            | X                                                                                                        |                                                                                                                                                                                                                                          |                                                                                                                                   |
|                                       | Scholarly Project                                                                     |                                                                                                                                                                                                                                                                                    |                                                                                                                                        |                                                                                                                         |                                                                                                                                                                                                              |                                                                                                                                            |                                                                                                                                                                                                                    |                                                                                                              |                                                                                                          |                                                                                                                                                                                                                                          |                                                                                                                                   |

MCY: Major Clinical Year (required clinical rotations), IPE: Interprofessional Education, FCM: Foundations of Clinical Medicine, BHD: Body in Health and Disease, OB/GYN: Obstetrics and Gynecology, M&P Week: Mechanisms and Practice Week, R4MCY: Ready for Major Clinical Year, R4R: Ready for Residency

\*Optional electives are denoted by an asterisk. All other activities are required.

Appendix 2. [Insert Title]

|                                                                                   |                                 |
|-----------------------------------------------------------------------------------|---------------------------------|
|                                                                                   | Phase                           |
|  | Ready 4 VP&S                    |
|  | Fundamentals                    |
|  | Major Clinical Year             |
|  | Differentiation and Integration |

| Phase                                                                                                   | Course                                    | Description of Curricular Activity                                                                                                                                                                                                                   | Modes of Assessment                                                                                     |
|---------------------------------------------------------------------------------------------------------|-------------------------------------------|------------------------------------------------------------------------------------------------------------------------------------------------------------------------------------------------------------------------------------------------------|---------------------------------------------------------------------------------------------------------|
|                        | Pre-Orientation Summer Reading Curriculum | <u>Just Medicine</u> chapters 2&5 by Matthew[i], <u>Fatal Invention</u> , chapters 1,2 &6, by Roberts [ii]; <u>Medical Apartheid</u> , chapter 7 by Washington[iii]; and “The Fire Next Time” by Baldwin.[iv]                                        | Discussion participation in the sociobehavioral medicine course: Foundations of Clinical Medicine (FCM) |
|                                                                                                         | Orientation                               | Four community orientation sessions: service learning lecture, community history lecture, community leader panel, and asset mapping walking tour                                                                                                     | Walking tour teams of 4 students present a 5 minute powerpoint presentation within FCM seminars         |
| Lecture: History of racism in medicine: includes local VP&S history (e.g., slaveholder faculty leaders) |                                           | None                                                                                                                                                                                                                                                 |                                                                                                         |
|                       | Biomolecular and Cellular Mechanisms      | Students explore the health implications of lack of housing and food access through a self-directed learning report. Each student will identify a question, create learning objectives, investigate, and write a report with appropriate references. | Student submissions are assessed against a rubric.                                                      |
|                      | Pharmacology                              | None                                                                                                                                                                                                                                                 | N/A                                                                                                     |
|                      | Genetics                                  | <b>Format: 2 Lectures, 1 small group discussion</b><br><b>Content:</b> Definitions of race, ancestry, ethnicity; bias in population screening and ancestry search tools, ethics; health disparities                                                  | Multiple Choice questions (MCQ)                                                                         |
|                      | Anatomy                                   | 2 Lectures<br>Content: intersex variation, melanin-related gingival mucosa appearance, historical Black pioneer: Viven Thomas (Tetralogy of Fallot)                                                                                                  | None                                                                                                    |
|                                                                                                         |                                           |                                                                                                                                                                                                                                                      | N/A                                                                                                     |

|                                                                                   |                                                                               |                                                                                                                                                                                                                                                                                                                                                                                                                                        |                                                                                                                                                                                                                                          |
|-----------------------------------------------------------------------------------|-------------------------------------------------------------------------------|----------------------------------------------------------------------------------------------------------------------------------------------------------------------------------------------------------------------------------------------------------------------------------------------------------------------------------------------------------------------------------------------------------------------------------------|------------------------------------------------------------------------------------------------------------------------------------------------------------------------------------------------------------------------------------------|
|                                                                                   | Histology and Pathology                                                       | None                                                                                                                                                                                                                                                                                                                                                                                                                                   |                                                                                                                                                                                                                                          |
|                                                                                   | Foundations of Clinical Medicine (FCM): 3 semester social behavioral medicine | Lectures, small group seminars, self-reflection (implicit association test)<br>Content: Structural racism; health equity; bias in research; implicit bias, health disparities, SDOH, interpreter use, cross-cultural communication, structural competency, advocacy                                                                                                                                                                    | Written assignments: SDOH; advocacy op-ed; multiple perspectives<br>Seminar discussion participation<br>Simulated communication skills practice<br>Written narrative medicine-based reflection (required but not graded) (cite 2 papers) |
|  | Data Science                                                                  | Discussion, exercises, readings explores patterns of health disparities by race/ethnicity, social determinants of health, systematic causality, health equity, and policy solutions                                                                                                                                                                                                                                                    | exam questions test students on ability to identify interaction of health, race, and other factors, understanding historical impact of systematic exclusion based on data-driven analyses                                                |
|                                                                                   | Evidence Based Medicine                                                       | Population health lecture that focuses on ____<br>Tuskegee, Nuremberg laws                                                                                                                                                                                                                                                                                                                                                             |                                                                                                                                                                                                                                          |
|                                                                                   | Immunology                                                                    |                                                                                                                                                                                                                                                                                                                                                                                                                                        | Multiple choice question assessment                                                                                                                                                                                                      |
|                                                                                   | Neurology                                                                     |                                                                                                                                                                                                                                                                                                                                                                                                                                        |                                                                                                                                                                                                                                          |
|                                                                                   | Cardiology                                                                    | Lecture,<br>Content: on social determinants of health (SDoH) in cardiovascular disease expects students to define SDoH, identify places of interventions, and exposure to examples of SDoH in HTN, cardiac catheterization, STEMI/N Stemi management                                                                                                                                                                                   | Final Exam                                                                                                                                                                                                                               |
|                                                                                   | Cardiology                                                                    | Lecture: Allostatic load; SDOH, health disparities in cardiac catheterization, STEMI/N management,                                                                                                                                                                                                                                                                                                                                     | Multiple choice questions (MCQ)                                                                                                                                                                                                          |
|                                                                                   | Pulmonology                                                                   | Lecture: Race-based pulmonary function testing                                                                                                                                                                                                                                                                                                                                                                                         |                                                                                                                                                                                                                                          |
|                                                                                   | Nephrology                                                                    | Lecture and self directed learning sessions examining the use of estimated glomerular filtration rate, a race based algorithm. The series examines the use of the algorithm, harmful implications in access to transplant and other treatment modalities, and alternatives to race-based calculations.<br><br>The course also offers opportunities for summer internships to engage in health care disparities research in Nephrology. |                                                                                                                                                                                                                                          |

|                                                                                     |                                   |                                                                                                                                                                                                                                                                                                                                                                                                      |                                                          |
|-------------------------------------------------------------------------------------|-----------------------------------|------------------------------------------------------------------------------------------------------------------------------------------------------------------------------------------------------------------------------------------------------------------------------------------------------------------------------------------------------------------------------------------------------|----------------------------------------------------------|
|                                                                                     |                                   | Intro to Kidney Transplant Lecture discusses disparities in who receives kidneys                                                                                                                                                                                                                                                                                                                     | Final Exam                                               |
|                                                                                     |                                   | Lectures on ESKD and Transplant Disparities                                                                                                                                                                                                                                                                                                                                                          | Final Exam                                               |
|                                                                                     | Hematology                        | Lecture: sickle cell disparities                                                                                                                                                                                                                                                                                                                                                                     | none                                                     |
|                                                                                     | Microbiology & Infectious Disease |                                                                                                                                                                                                                                                                                                                                                                                                      |                                                          |
|                                                                                     | Microbiology & Infectious Disease | 3 Lectures: Intersection of infectious disease and carceral care; Tuskegee Study; systemic racism in HIV care;                                                                                                                                                                                                                                                                                       |                                                          |
|                                                                                     | Gastroenterology                  | Public Health Commute Asynchronous multi-media module: GI and Liver Diseases: MELD score-related health disparities                                                                                                                                                                                                                                                                                  | assessed for completion only, 5% towards final grade     |
|                                                                                     | Endocrinology                     | PHC Module: Endocrinology: obesity bias                                                                                                                                                                                                                                                                                                                                                              | assessed for completion only, 5% towards final grade     |
|                                                                                     |                                   | Patient as professor presentation: obesity bias                                                                                                                                                                                                                                                                                                                                                      | ?                                                        |
|                                                                                     |                                   | Lecture on gender transition medicine                                                                                                                                                                                                                                                                                                                                                                | ?                                                        |
|                                                                                     |                                   | OSCE relates to disparities in diabetes care                                                                                                                                                                                                                                                                                                                                                         | OSCE                                                     |
|                                                                                     | Rheumatology                      | PHC Module: Rheumatology: "Rheum" for Change                                                                                                                                                                                                                                                                                                                                                         | assessed for completion only, 5% towards final grade     |
|                                                                                     | Oncology                          | PHC Module: Oncology: Cancer Prevention and Screening                                                                                                                                                                                                                                                                                                                                                | assessed for completion only, 5% towards final grade     |
|  | Psychiatry                        | Starting in 2023 SMALL GROUP DISCUSSION ON RACE BY PATRICE MALONE (previously done by Sidney Hankerson and Nicole Pacheco) Themes that recur through the small group sessions emphasize empathy, reflection on personal bias in decision making, recognition of the impact of social determinants of health and identification of key areas of health care disparity in Psychiatry and more broadly. |                                                          |
|                                                                                     |                                   | A specific small group session devoted to "Access and Advocacy" addresses learning objectives that include understanding the root causes of mental health inequities, learning different models for increasing clinical engagement, and developing strategies to advocate for mental health services.. This session is reprised during the psych MCY rotation.                                       |                                                          |
|  | Narrative Medicine Elective       | Race Sounds: Nicole Furlonge African American Literature                                                                                                                                                                                                                                                                                                                                             | Race Sounds: Nicole Furlonge African American Literature |
|                                                                                     | FCM II                            |                                                                                                                                                                                                                                                                                                                                                                                                      |                                                          |
|                                                                                     | FCM III                           |                                                                                                                                                                                                                                                                                                                                                                                                      |                                                          |



|     |                   |                                                                                                                                                                                                                                                                                                                                                                                                                       |                                                          |
|-----|-------------------|-----------------------------------------------------------------------------------------------------------------------------------------------------------------------------------------------------------------------------------------------------------------------------------------------------------------------------------------------------------------------------------------------------------------------|----------------------------------------------------------|
|     | R4MCY             | R4MCY is a semester-long course held during the semester before MCY where students learn basic clinical and interpersonal skills to prepare for learning on the wards. Assigned readings include <i>The Microaggressions Triangle Model: A Humanistic Approach to Navigating Microaggressions in Health Professions Schools</i> , and lectures on responding to bias on the wards and how to report instances of bias | none                                                     |
| MCY | OB/GYN            | 2-hour multi-media asynchronous education module: carceral care for people with uteruses, adverse childhood experiences, SDOH, trauma informed care<br><br>Two modules on providing trauma-informed care for transgender, gender-diverse, and intersex patients<br><br>Lecture begun in July 2022 about DEI and using racism instead of race                                                                          | 2% of final grade if complete the Articulate Rise module |
| MCY | Surgery           | Upstander/Teamwork lecture and discussion                                                                                                                                                                                                                                                                                                                                                                             | Discussion participation and reflective "exit ticket"    |
| MCY | Neurology         |                                                                                                                                                                                                                                                                                                                                                                                                                       |                                                          |
| MCY | Psychiatry        | Diversity & Disparity – is no longer being done, faculty is in the process of finding a new resident to lead session. There were no slides. Emphasis on 1) impact of race on psych diagnosis; 2) police involvement; 3) aggressive treatment and more treatment over objection; and 4) delay in treatment due to appropriate mistrust and decreased access = potentially objectives 1, 2, 3, 4, 5?                    |                                                          |
| MCY | Pediatrics        |                                                                                                                                                                                                                                                                                                                                                                                                                       |                                                          |
| MCY | Internal Medicine |                                                                                                                                                                                                                                                                                                                                                                                                                       |                                                          |

|     |                    |                                                                                                                                                                                                                                                                                                                                                                                                                                                                                                                                                                                                                                                                                                                                                                                                                                                                                                                                                                                                                                                                                                                                                                                                                                                                                                                                   |                                                                                       |
|-----|--------------------|-----------------------------------------------------------------------------------------------------------------------------------------------------------------------------------------------------------------------------------------------------------------------------------------------------------------------------------------------------------------------------------------------------------------------------------------------------------------------------------------------------------------------------------------------------------------------------------------------------------------------------------------------------------------------------------------------------------------------------------------------------------------------------------------------------------------------------------------------------------------------------------------------------------------------------------------------------------------------------------------------------------------------------------------------------------------------------------------------------------------------------------------------------------------------------------------------------------------------------------------------------------------------------------------------------------------------------------|---------------------------------------------------------------------------------------|
| MCY | Primary Care       | <p>Confirmed MCY-F assignment on Structural Determinants of Health likely covers anti-racist objectives 2, 4, 5, and 7 for all students WITH assessment for grade</p> <p>The specifics depend on which patient case and structure students choose to identify (i.e. racism vs immigration vs economics, etc.)</p> <p>Students also have discussion along with MCY-F so students likely able to learn from each other, but Drs. Chang and Leeds aren't present to confirm the content of these sessions</p> <p>Potentially also cover learning objectives 6 and 8 integrated into the didactics on diabetes and opioid use disorder</p> <p>Other options:<br/>         Considering non MCY-F discussion that excludes directors but would have to meet certain learning objectives<br/>         Create an additional OSCE case to think about patients impacted by a history of incarceration and/or OUD; would likely be a yearly screening visit without complaint<br/>         Next Steps:<br/>         EJ fellow to review didactic slides and confirm which learning objectives are included or if some could be more explicitly emphasized?<br/>         Aquifer case on interpreters but need to review if they already have materials related to carceral care or opioid use<br/>         2,4,5,7 -&gt; potentially 8?</p> | Working on Assessment and Feedback mechanism for MCY-F Structural Analysis Assignment |
| MCY | Emergency Medicine | None                                                                                                                                                                                                                                                                                                                                                                                                                                                                                                                                                                                                                                                                                                                                                                                                                                                                                                                                                                                                                                                                                                                                                                                                                                                                                                                              |                                                                                       |
| MCY | Anesthesiology     | Simulated IV practice includes skills for placing IV with skin of varying complexions                                                                                                                                                                                                                                                                                                                                                                                                                                                                                                                                                                                                                                                                                                                                                                                                                                                                                                                                                                                                                                                                                                                                                                                                                                             |                                                                                       |
| MCY | Urology            | <p>Lecture: PSA and racial disparities, complex interaction between genetics, racism, and SDoH in presentations and prognosis of prostate cancer</p> <p>Optional articles: gender affirming care in urology, prostate cancer screening disparities</p> <p>Optional podcast: "Fans for the Cure" podcast on PSA and prostate cancer, which touches on racial disparities</p>                                                                                                                                                                                                                                                                                                                                                                                                                                                                                                                                                                                                                                                                                                                                                                                                                                                                                                                                                       |                                                                                       |
| MCY | Neurosurgery       | None                                                                                                                                                                                                                                                                                                                                                                                                                                                                                                                                                                                                                                                                                                                                                                                                                                                                                                                                                                                                                                                                                                                                                                                                                                                                                                                              | None                                                                                  |
| MCY | Orthopedic Surgery | None                                                                                                                                                                                                                                                                                                                                                                                                                                                                                                                                                                                                                                                                                                                                                                                                                                                                                                                                                                                                                                                                                                                                                                                                                                                                                                                              | None                                                                                  |

|     |                                                                |                                                                                                                                                                                                                                                                                                                                                                                                                                                                                                                                                                                                                                                                                                                                                                                                                                                                                                                                                                                                                                                                                                                                                                                                                                                                                                                                                                                                                                                                                                                                                                                                                                                                                                                                                                                                                                                                                                                                                                                                                                                                                                                                                                                                                                                                                                                                                                                                                                                                                                                                                                                         |                                          |
|-----|----------------------------------------------------------------|-----------------------------------------------------------------------------------------------------------------------------------------------------------------------------------------------------------------------------------------------------------------------------------------------------------------------------------------------------------------------------------------------------------------------------------------------------------------------------------------------------------------------------------------------------------------------------------------------------------------------------------------------------------------------------------------------------------------------------------------------------------------------------------------------------------------------------------------------------------------------------------------------------------------------------------------------------------------------------------------------------------------------------------------------------------------------------------------------------------------------------------------------------------------------------------------------------------------------------------------------------------------------------------------------------------------------------------------------------------------------------------------------------------------------------------------------------------------------------------------------------------------------------------------------------------------------------------------------------------------------------------------------------------------------------------------------------------------------------------------------------------------------------------------------------------------------------------------------------------------------------------------------------------------------------------------------------------------------------------------------------------------------------------------------------------------------------------------------------------------------------------------------------------------------------------------------------------------------------------------------------------------------------------------------------------------------------------------------------------------------------------------------------------------------------------------------------------------------------------------------------------------------------------------------------------------------------------------|------------------------------------------|
| MCY | Mechanisms & Practice: week intersession for clinical students | Required workshops: Ethics, Upstander Skills<br>Elective workshops: From Clinical Practice to Community Empowerment, Mad Pride + Disability Justice for Medical School Students, Project LETS, Interrupting Microaggressions in Clinical Practice, and Medical Decision Making, which touches on race bias, Case Studies in Climate and Health, Curriculum: LGBTQ+ 101, Physician Advocacy                                                                                                                                                                                                                                                                                                                                                                                                                                                                                                                                                                                                                                                                                                                                                                                                                                                                                                                                                                                                                                                                                                                                                                                                                                                                                                                                                                                                                                                                                                                                                                                                                                                                                                                                                                                                                                                                                                                                                                                                                                                                                                                                                                                              | Self-assessment survey: upstander skills |
| D&I | Ready for Residency (1 month pre-graduation course)            | LGBTQIA Health<br>Upstander Training                                                                                                                                                                                                                                                                                                                                                                                                                                                                                                                                                                                                                                                                                                                                                                                                                                                                                                                                                                                                                                                                                                                                                                                                                                                                                                                                                                                                                                                                                                                                                                                                                                                                                                                                                                                                                                                                                                                                                                                                                                                                                                                                                                                                                                                                                                                                                                                                                                                                                                                                                    |                                          |
| D&I | Electives                                                      | <p><b>Advanced Topics in Global Health</b> - This course provides an understanding of the intersections between health care delivery, policy and equity on a global scale.</p> <p><b>Human Nature: DNA, Race, and Identity</b> - This seminar is taught from the perspective of four different disciplines; Law, Religion, Science, and Medicine. The course focuses on human identity, beginning with the individual over the lifespan and progressing to communal and global viewpoints using a framework of perspectives from biology, genetics, medicine, public health, psychiatry, religion and the law.</p> <p><b>Interdisciplinary Correlation: Using the Humanities to Explore Healthcare Inequities</b> - Students reflect on selected works of art and literature as a basis to explore issues of bias and discrimination in medicine at the individual (patient, practitioner) and systematic levels, including a focus on racial disparities in healthcare. Included is an in-depth exploration of the bioethical principles of informed consent and distributive justice. Interdisciplinary guest speakers cover topics on bias in medicine from the fields of health services research, medicine, pediatrics, psychiatry, infectious diseases and Ob/Gyn, including one workshop on implicit bias and another workshop on microaggressions. Other topics covered include the historical context of race and medicine, community health research partnerships, promoting health literacy by integrating art into pediatric practice, and racial disparities in maternal and fetal outcomes.</p> <p><b>Racism and Health Elective</b> - Seminar-based four-week course. Students explore how the concepts of race and racism have and continue to impact health in the US. The relationship between racism and health is critiqued at structural, institutional, and individual levels in order to effectively evaluate and craft policies and interventions to address health disparities. Week 1: introductory history of race and racism in the US, with a focus on the biological and social constructs of race, key moments perpetuating racism in the US, and critical race theory and intersectionality. Week 2: health disparities by race across the medical specialties. Week 3: strategies being used to address health inequities, with an emphasis on health policy and specialty-specific interventions. Week 4: students are asked to draft an op-ed addressing a specific anti-racism initiative that they may implement in their specialty of choice.</p> | varies by course                         |
| D&I | Scholarly Project                                              | No standard content                                                                                                                                                                                                                                                                                                                                                                                                                                                                                                                                                                                                                                                                                                                                                                                                                                                                                                                                                                                                                                                                                                                                                                                                                                                                                                                                                                                                                                                                                                                                                                                                                                                                                                                                                                                                                                                                                                                                                                                                                                                                                                                                                                                                                                                                                                                                                                                                                                                                                                                                                                     | none                                     |

Abbreviations  
References

---

[i] Matthew, DB. Just Medicine : A Cure for Racial Inequality in American Health Care, New York University Press, 2015.

[ii] Roberts DE. Fatal Invention : How Science, Politics, and Big Business Re-Create Race in the Twenty-First Century. New York: The New Press; 2011.

[iii] Washington HA. Medical Apartheid : The Dark History of Medical Experimentation on Black Americans From Colonial Times to the Present. New York: Anchor; 2006.

[iv] Baldwin, J. The Fire Next Time, New York: Vintage International, 1993. This essay was first published in *The Progressive* as “A Letter to My Nephew.” Baldwin later included his revised version as “My Dungeon Shook” in The Fire Next Time. We will be using the version from *The Progressive* (available on Courseworks and online) for our discussion.
